# Supplementary material for: An Africa-wide genomic evolution of insecticide resistance in the malaria vector Anopheles funestus involves selective sweeps, copy number variations, gene conversion and transposons
Source: PLOS journal article supplement (doi:10.1371/journal.pgen.1008822), 2020-06-04
Supplement: S9 (10.1371/journal.pgen.1008822.s009) [file journal.pgen.1008822.s009]

| Sample ID           | Reads to align (R1+R2+R0) | Aligned reads (%) <sup>1</sup> | Aligned reads, filtered (%) <sup>1,2</sup> | Aligned in pair (%) <sup>3</sup> | Properly paired (%) <sup>3,4</sup> | Singleton (%) <sup>3</sup> |
|---------------------|---------------------------|--------------------------------|--------------------------------------------|----------------------------------|------------------------------------|----------------------------|
| GHA-Obuasi-2014     | 100,593,664               | 61,708,566 (61%)               | 56,122,278 (56%)                           | 55,690,966 (99%)                 | 48,551,862 (87%)                   | 260,831 (0.5%)             |
| BEN-Kpome-2015      | 99,049,555                | 77,760,764 (79%)               | 70,065,274 (71%)                           | 69,590,103 (99%)                 | 65,309,148 (93%)                   | 250,733 (0.4%)             |
| CMR-Mebellom-2014   | 98,674,983                | 60,566,286 (61%)               | 55184243 (56%)                             | 54,726,342 (99%)                 | 47,294,648 (86%)                   | 280,747 (0.5%)             |
| COD-Kinshasa-2015   | 107,938,818               | 63,691,312 (59%)               | 56,850,352 (53%)                           | 55,619,705 (98%)                 | 49,126,540 (86%)                   | 803,615 (1.4%)             |
| COD-Mikalayi-2015   | 108,730,737               | 88,874,076 (82%)               | 80,470,521 (74%)                           | 79,871,664 (99%)                 | 71,656,064 (89%)                   | 320,287 (0.4%)             |
| UGA-Tororo-2014     | 96,991,083                | 78,309,572 (81%)               | 71,449,749 (74%)                           | 70,908,959 (99%)                 | 61,732,826 (86%)                   | 324,735 (0.5%)             |
| MWI-Chikwawa-2014   | 90,976,162                | 30,929,682 (34%)               | 28,399,605 (31%)                           | 28,158,651 (99%)                 | 24,343,506 (86%)                   | 155,992 (0.5%)             |
| MWI-Chikwawa-2002   | 100,344,549               | 82,126,137 (82%)               | 74,115,352 (74%)                           | 73,528,738 (99%)                 | 67,567,770 (91%)                   | 328,021 (0.4%)             |
| MOZ-Manhica-2016    | 168,020,763               | 75,930,322 (45%)               | 63,776,575 (38%)                           | 62,922,778 (99%)                 | 54,270,794 (85%)                   | 293,960 (0.5%)             |
| MOZ-Morrumbene-2002 | 103,013,413               | 74,942,373 (73%)               | 67,568,570 (66%)                           | 66,783,585 (99%)                 | 62,829,476 (93%)                   | 572,374 (0.8%)             |

<sup>1</sup> % of reads to align.

<sup>2</sup> Aligned reads filtered to remove duplicates and reads with mapping quality <10.

<sup>3</sup> % of filtered aligned reads.

<sup>4</sup> Properly paired: both the read and its mate are mapped to opposing strands of the reference sequence, with 3' ends innermost and 5' ends within the allowed distance from each other (0-500 bp).
